# Supplementary material for: Cryptic-Prophage-Encoded Small Protein DicB Protects Escherichia coli from Phage Infection by Inhibiting Inner Membrane Receptor Proteins
Source: PubMed Central journal article supplement (PMC6832061; doi:10.1128/jb.00475-19), 2019-11-05
Supplement: JB.00475-19-s0001.pdf [file JB.00475-19-s0001.pdf]

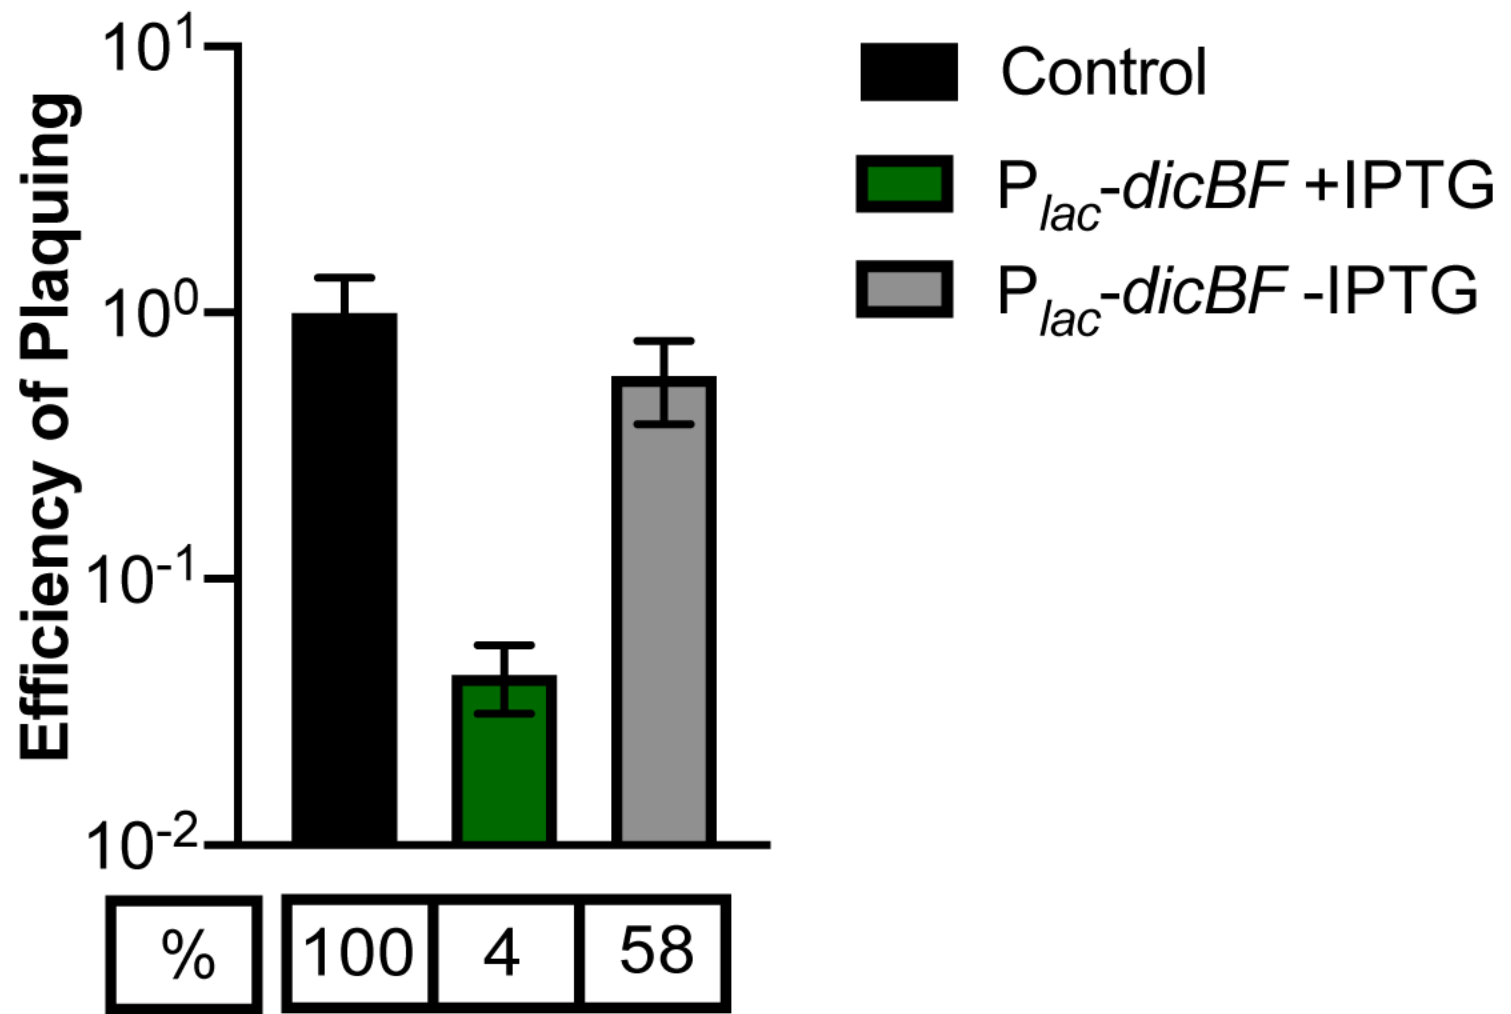

**Fig. S1. Effect of the  $P_{lac}$  promoter on  $\lambda vir$  infection.** EOP assay was carried out as described in Fig. 1B, without and with induction of the *dicBF* operon with 0.5mM IPTG. The strains used in this experiment are control (DJ624) and  $P_{lac}$ -*dicBF* (DB240).

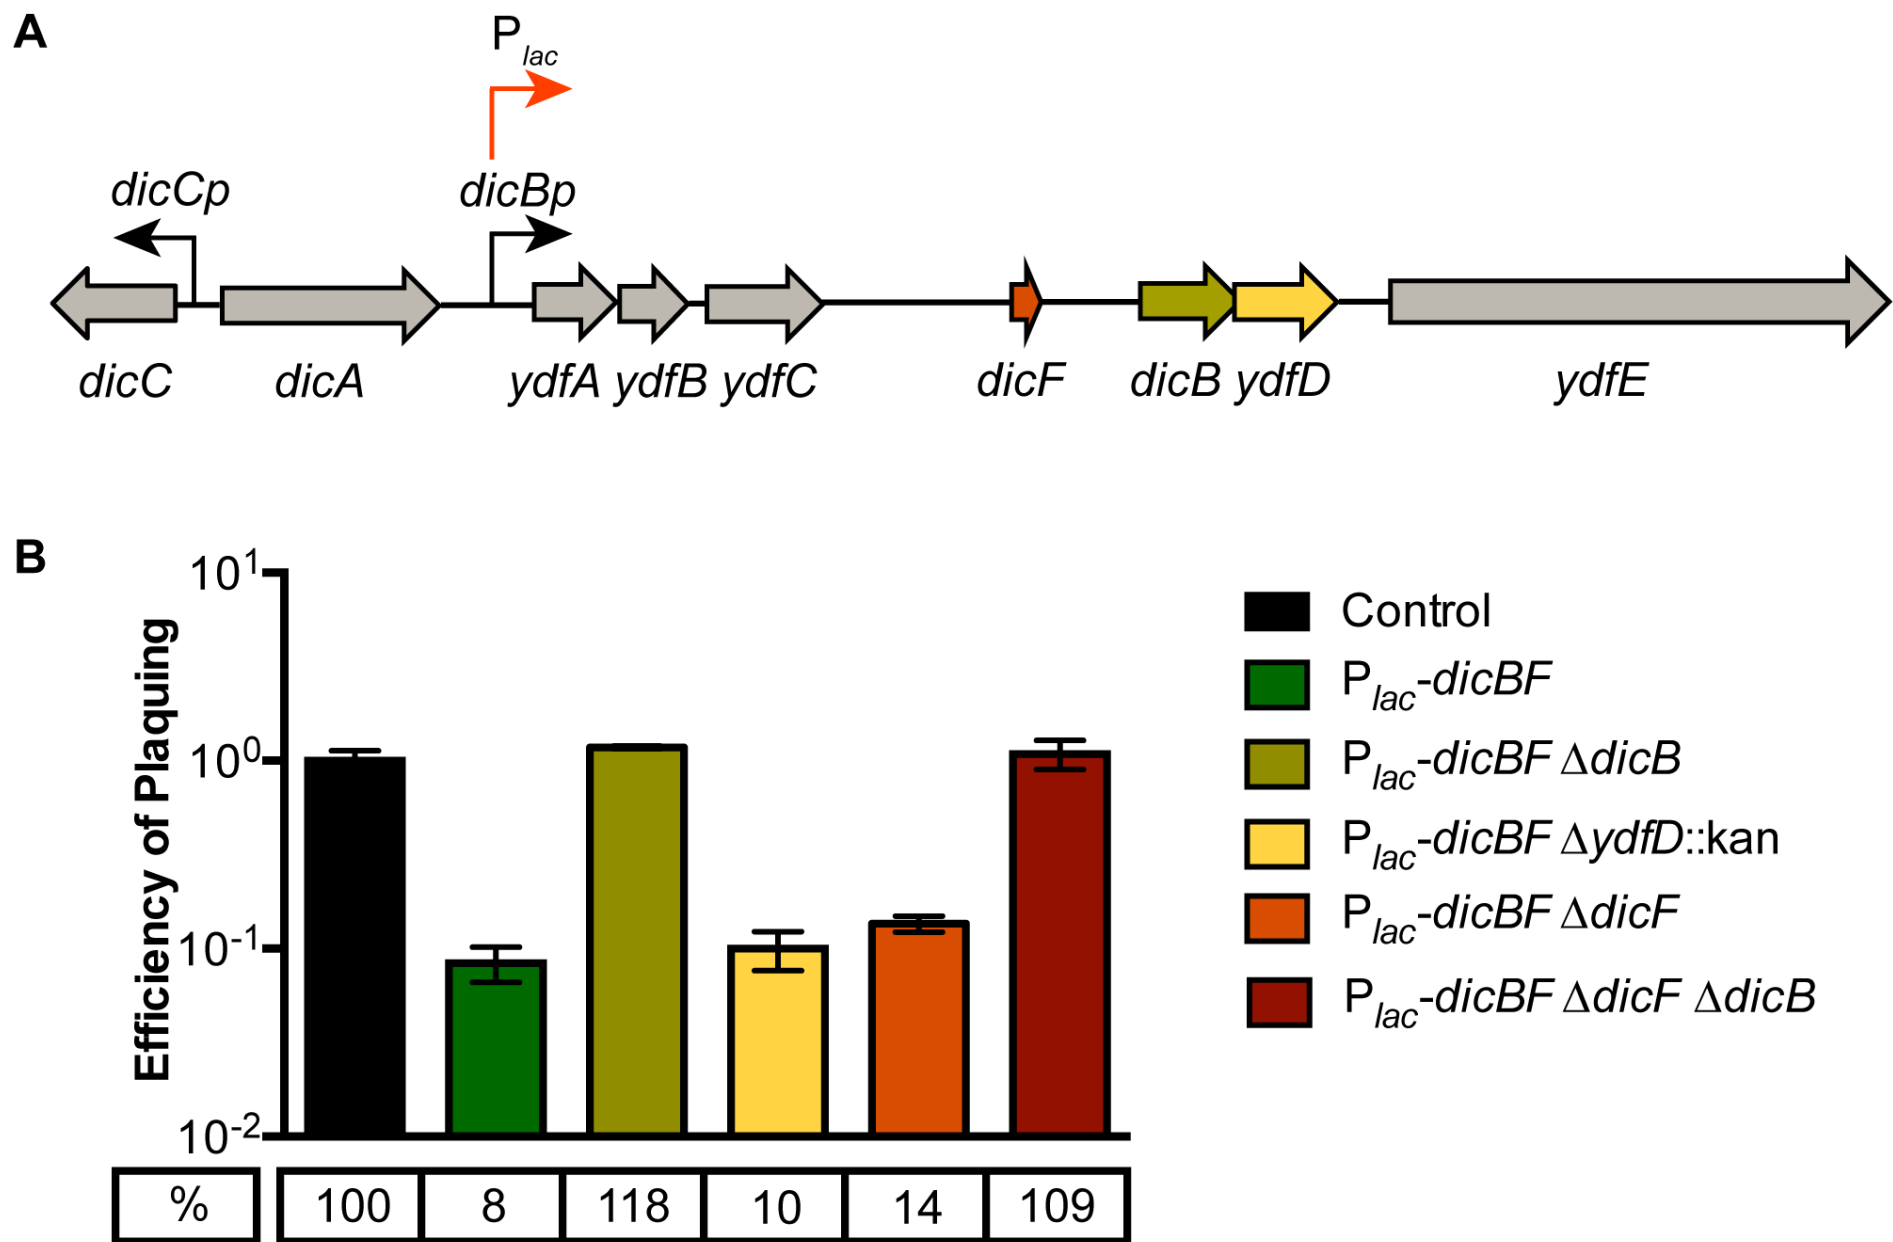

**Fig. S2. Transient induction of the *dicBF* operon protects against wild-type  $\lambda$  infection.** (A) The *dicBF* locus on Qin prophage of *E. coli* K-12. The red arrow indicates where  $P_{lac}$  is inserted on the chromosome, replacing the native *dicBp* promoter. (B) Strains used in this experiment are: Control (DJ480),  $P_{lac}$ -*dicBF* (DB240),  $P_{lac}$ -*dicBF*  $\Delta$ *dicB* (PR165),  $P_{lac}$ -*dicBF*  $\Delta$ *dicF* (DB247),  $P_{lac}$ -*dicBF*  $\Delta$ *ydfD*::kan (PR164) and  $P_{lac}$ -*dicBF*  $\Delta$ *dicF*  $\Delta$ *dicB* (DB248). EOP was calculated as described for Fig. 1B.

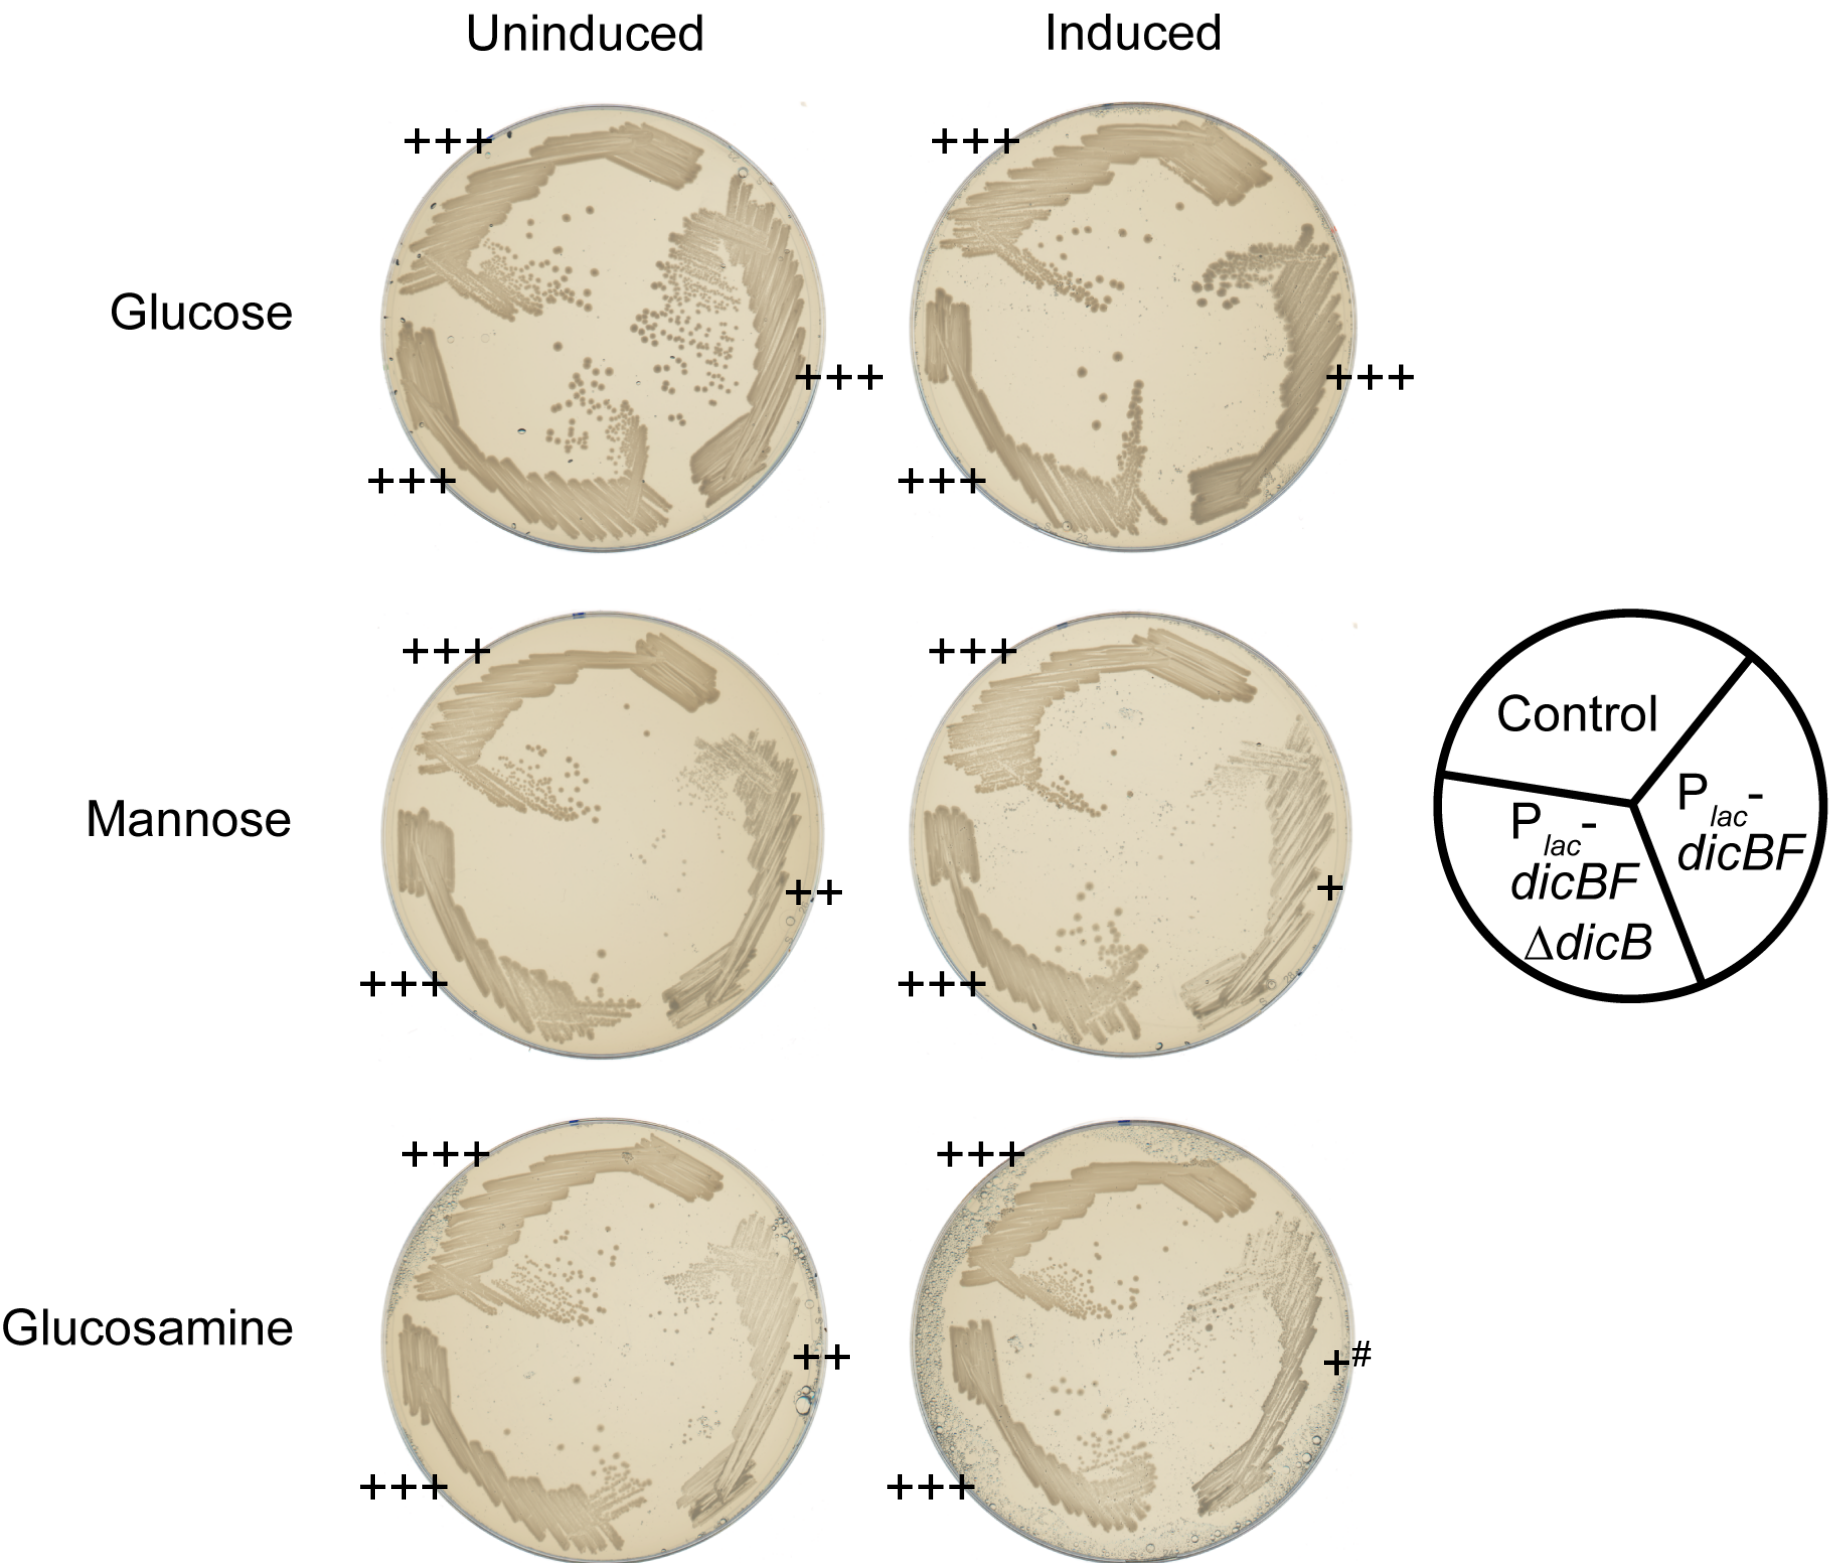

**Fig. S3. Growth of *dicBF* expressing strains is inhibited on mannose and glucosamine plates.** The strains were streaked on M63 minimal medium with 0.2% sugars as C source without or with 0.025mM IPTG and incubated for 44 hours at 37°C. The strains used are control (DJ624),  $P_{lac}^- dicBF$  (DB240) and  $P_{lac}^- dicBF \Delta dicB$  (PR165). The  $P_{lac}$  promoter is leaky and we suspect low level expression of the *dicBF* operon even at 0mM IPTG. +++ indicates growth of the control strain on respective sugars, ++ and + indicates decremental growth based on the size of the single colonies on the plate compared to the control strain on that sugar. # indicates that  $P_{lac}^- dicBF$  suppressor colonies arise on glucosamine plate with IPTG induction, which is explained in the Results section.

| Strain name                | Genotype                                                  | Source                                          |
|----------------------------|-----------------------------------------------------------|-------------------------------------------------|
| DJ480                      | MG1655 $\Delta lac$ X74                                   | D. Jin, NCI, Frederick, MD                      |
| DJ624                      | DJ480 <i>mal::lacI<sup>a</sup></i>                        | D. Jin                                          |
| NM2000                     | DJ624 mini $\lambda tet$                                  | N. Majdalani, NCI, Bethesda, MD                 |
| DB240                      | NM2000 <i>cat-P<sub>lac</sub>-dicBF</i>                   | (1)                                             |
| DB243                      | DB240 $\Delta dicB$                                       | (1)                                             |
| DB247                      | DB240 $\Delta dicF$                                       | (1)                                             |
| DB248                      | DB240 $\Delta dicF \Delta dicB$                           | (1)                                             |
| PR163                      | DB240 $\Delta dicB::kan$                                  | This study                                      |
| PR164                      | DB240 $\Delta ydfD::kan$                                  | This study                                      |
| PR165                      | DB240 $\Delta dicB$                                       | This study                                      |
| PR178                      | DJ624 $\Delta minC::kan-araC-P_{BAD}-ccdB$ (for E156A)    | This study                                      |
| PR179                      | DJ624 $\Delta minC::kan-araC-P_{BAD}-ccdB$ (for R172A)    | This study                                      |
| PR180                      | DJ624 <i>minC</i> E156A                                   | This study                                      |
| PR181                      | DJ624 <i>minC</i> R172A                                   | This study                                      |
| PR182                      | <i>cat-P<sub>lac</sub>-dicBF minC</i> E156A               | This study                                      |
| PR183                      | <i>cat-P<sub>lac</sub>-dicBF minC</i> R172A               | This study                                      |
| PR187                      | DJ624 $\Delta manXYZ::kan$                                | This study                                      |
| PR191                      | DB240 $\Delta manXYZ::kan$                                | This study                                      |
| YS208                      | DJ480 $\Delta manXYZ::kan$                                | (3)                                             |
| YS243                      | DJ480 $\Delta sgrS::kan-araC-P_{BAD}-ccdB$                | Lab collection                                  |
| BW25113                    |                                                           | J. Cronan, University of Illinois, Urbana, IL   |
| BW25113 $\Delta fhuA::kan$ |                                                           | (2)                                             |
| BW25113 $\Delta tonB::kan$ |                                                           | (2)                                             |
| BW25113 $\Delta lamB::kan$ |                                                           | (2)                                             |
| BW25113 $\Delta ompC::kan$ |                                                           | (2)                                             |
|                            |                                                           |                                                 |
| Phage name                 | Genotype                                                  | Source                                          |
| $\lambda vir$              |                                                           | J. Gardner, University of Illinois, Urbana, IL  |
| $\lambda$ wild-type        |                                                           | A. Kuzminov, University of Illinois, Urbana, IL |
| T3                         |                                                           | A. Kuzminov                                     |
| T6                         |                                                           | A. Kuzminov                                     |
| T5                         |                                                           | A. Kuzminov                                     |
| T7                         |                                                           | A. Kuzminov                                     |
| $\phi 80$                  |                                                           | A. Kuzminov                                     |
| HK97                       |                                                           | A. Davidson, University of Toronto, Toronto, ON |
| HK544                      |                                                           | A. Davidson                                     |
| HK75                       |                                                           | A. Davidson                                     |
| 185                        | $\lambda h80 \Delta(att int) i21C$ (B274)                 | J. Gardner                                      |
| 148                        | $\lambda bio936 (attR^+) imm21^{ts}$                      | J. Gardner                                      |
| 169                        | $\lambda gal8 bio936 (attB^+) Jam imm21^{ts}$             | J. Gardner                                      |
| 173                        | $\lambda h80 \Delta 9 [att50-int50-red] imm434 CI$ (G127) | J. Gardner                                      |
| 158                        | $\lambda bio16A CI857$                                    | J. Gardner                                      |
| 138                        | $\lambda gal8 CI857$                                      | J. Gardner                                      |
| 434                        |                                                           | S. Adhya, NCI, Bethesda, MD                     |

**Table S1.** Strains and phages used in this study.

#### Literature cited

- (1) Balasubramanian D, Rangunathan PT, Fei J, Vanderpool CK. 2016. A Prophage-Encoded Small RNA Controls Metabolism and Cell Division in *Escherichia coli*. *mSystems* 1:e00021-15.
- (2) Baba T, Ara T, Hasegawa M, Takai Y, Okumura Y, Baba M, Datsenko KA, Tomita M, Wanner BL, Mori H. 2006. Construction of *Escherichia coli* K-12 in-frame, single-gene knockout mutants: the Keio collection. *Mol Syst Biol* 2:2006.0008.
- (3) Sun Y, Vanderpool CK. 2013. Physiological Consequences of Multiple-Target Regulation by the Small RNA SgrS in *Escherichia coli*. *J Bacteriol* 195:4804–4815.

| Oligonucleotides Name | Description                                                                 | Sequence                                                                         |
|-----------------------|-----------------------------------------------------------------------------|----------------------------------------------------------------------------------|
| O-PR185               | Forward primer to delete <i>dicB</i>                                        | CAGGCACTGCATCACAAAATTCATTGTTGAGGACGCGATA<br>GTGTAGGCTGGAGCTGCTTC                 |
| O-PR186               | Reverse primer to delete <i>dicB</i>                                        | AAATGCTGAATTCATTGTGCACATCCTTTTGGCATCAGACA<br>TTCCGGGGATCCGTCGACC                 |
| O-PR187               | Forward test primer for <i>dicB</i> deletion                                | GCTGAGCGCACGCGGAACAG                                                             |
| O-PR188               | Reverse test primer for <i>dicB</i> deletion                                | GTTCCGTTGCTGCAGTCATACTCCTGCA                                                     |
| O-PR189               | Forward primer to delete <i>ydfD</i>                                        | TTTACGTCTGATGCCAAAAGGATGTGCACAATGAATTCAGG<br>TGTAGGCTGGAGCTGCTTC                 |
| O-PR190               | Reverse primer to delete <i>ydfD</i>                                        | GCATATAAGAATGAAACCGGATATTTATTACGGAACTGTTA<br>TTCCGGGGATCCGTCGACC                 |
| O-PR191               | Forward test primer for <i>ydfD</i> deletion                                | GAAATTGGTGTCACTATCAGTAACCCAGTA                                                   |
| O-PR192               | Reverse test primer for <i>ydfD</i> deletion                                | GTCAGGAATAGCGGCGCAAA                                                             |
| O-PR205               | Forward primer to insert kan- <i>ccdB</i> in <i>minC</i> for R172A mutation | GATTGCCGATGGGAACATTCATGTCTATGGCATGATGCGC<br>ATAGGAACTTCAAGATCCCCTTATTAGAAGAACTCG |
| O-PR206               | Reverse primer to insert kan- <i>ccdB</i> in <i>minC</i> for R172A mutation | AAAATATTTGCGTTTCCCGGTCACCACTTGCCCCTGCCAGT<br>TATATCCCAGAACATCAGGTTAATGGCG        |
| O-PR207               | Forward primer to check <i>minC</i>                                         | CCGGTGCGTTCGCGTCAGCG                                                             |
| O-PR208               | Reverse primer to check <i>minC</i>                                         | TCAGCCAGTATTCACCTGCGATGGACACCA                                                   |
| O-PR209               | Forward primer to insert kan- <i>ccdB</i> in <i>minC</i> for E156A mutation | CCACAATGTGATCTGATTGTTACAAGCCACGTTAGCGCTGA<br>TAGGAACTTCAAGATCCCCTTATTAGAAGAACTCG |
| O-PR210               | Reverse primer to insert kan- <i>ccdB</i> in <i>minC</i> for E156A mutation | ACCGCGCATCATGCCATAGACATGAATGTTCCCATCGGCA<br>TTATATCCCAGAACATCAGGTTAATGGCG        |
| O-PR211               | Forward primer containing <i>minC</i> E156A mutation                        | CCACAATGTGATCTGATTGTTACAAGCCACGTTAGCGCTG<br>GGGCCGCTTGATTGCCGAT                  |
| O-PR212               | Reverse primer containing <i>minC</i> E156A mutation                        | ACCGCGCATCATGCCATAGACATGAATGTTCCCATCGGCA<br>ATCAAGGCGGCCCCAGCGCT                 |
| O-PR213               | Forward primer containing <i>minC</i> R172A mutation                        | GATTGCCGATGGGAACATTCATGTCTATGGCATGATGCGC<br>GGTGCGGCGCTGGCAGGGGC                 |
| O-PR214               | Reverse primer containing <i>minC</i> R172A mutation                        | AAAATATTTGCGTTTCCCGGTCACCACTTGCCCCTGCCAG<br>CGCCGCACCGCGCATCAT                   |
| O-PR214-2             | Forward test primer for <i>manXYZ</i> deletion                              | TATCAGAGACGCCTCTGATTTGGCAAAGAT                                                   |
| O-PR215               | Reverse test primer for <i>manXYZ</i> deletion                              | GATCGTCGATATTTGAACGCGGATTAACA                                                    |
| O-PR222               | Forward test primer for <i>minC</i> further upstream to O-PR207             | TGCAAAGATGCGCAACTTAAAGCCG                                                        |

**Table S2.** Oligonucleotides used to make strains in this study.

| Strains                                        | $\lambda$ vir | $\phi$ 80 | 173 ( $\lambda$ h80) | 185 ( $\lambda$ h80) |
|------------------------------------------------|---------------|-----------|----------------------|----------------------|
| DJ624                                          | +             | +         | +                    | +                    |
| DJ624<br><i><math>\Delta</math>manXYZ::kan</i> | *             | +         | +                    | +                    |
| BW25113                                        | +             | +         | +                    | +                    |
| BW25113<br><i><math>\Delta</math>fhuA::kan</i> | +             | —         | —                    | —                    |
| BW25113<br><i><math>\Delta</math>tonB::kan</i> | +             | —         | —                    | —                    |

**Table S3.** The phages used in Fig. 4 were titered on the strains listed to test their ability to form plaques. + denotes phage formed plaques, - denotes phage did not form plaques, and \* denotes phage formed tiny plaques.

| Strains                                        | $\lambda$ vir (pfu/ml) | Phage 434 (pfu/ml) | $\phi$ 80 (pfu/ml)    |
|------------------------------------------------|------------------------|--------------------|-----------------------|
| DJ624                                          | $1.53 \times 10^{10}$  | $6.8 \times 10^8$  | $9.9 \times 10^9$     |
| DJ624<br><i><math>\Delta</math>manXYZ::kan</i> | *                      | *                  | $3.2 \times 10^9$     |
| BW25113                                        | $1.41 \times 10^{10}$  | $7.5 \times 10^8$  | $9.1 \times 10^9$     |
| BW25113<br><i><math>\Delta</math>lamB::kan</i> | —                      | $8.7 \times 10^8$  | $1.26 \times 10^{10}$ |
| BW25113<br><i><math>\Delta</math>ompC::kan</i> | $1.23 \times 10^{10}$  | —                  | $9.6 \times 10^9$     |

**Table S4.** The phages used in Fig. 5B were titered on the different strains mentioned to test their ability to form plaques. - denotes phage did not form plaques and \* denotes phage formed tiny plaques.
